# Supplementary material for: PRMT5-mediated regulation of developmental myelination
Source: PubMed Central journal article supplement (PMC6053423; doi:10.1038/s41467-018-04863-9), 2018-07-19
Supplement: 41467_2018_4863_MOESM2_ESM.pdf [file 41467_2018_4863_MOESM2_ESM.pdf]

## **Description of Additional Supplementary Files**

**File Name: Supplementary Data 1**

**Description:** List of most significantly differentially regulated transcripts after loss of Prmt5.
